# Supplementary material
Source: publisher figshare collection journal article supplement (https://tandf.figshare.com/ndownloader/files/13997660)
Supplement: Supplementary file 1 [file 13997660]

**Supplementary Information**

**Process optimization for effective bio-decolourization of Reactive Orange 16 using Chemometric methods**

**Saurabh Mishra1 and Abhijit Maiti1***

*1Department of polymer and process engineering, Indian Institute of Technology Roorkee, Saharanpur Campus, Saharanpur, Uttar Pradesh, 247001, India*

*Corresponding author: [mabhifpt@iitr.ac.in](mailto:mabhifpt@iitr.ac.in), Tel. No. +91132-2714416

**S1. Experimental procedure**

*S1.1. Two-level factorial design for assessing the effects of operational parameters of decolourization conditions*

In this design, each factor is examined at two levels that quickly filter out unwanted factors. Finally, it determines the interactions of important factors.[52] This design is also used to select the minimum and maximum level of operational factors.[29] These full factorial two-level designs are also referred to as 2k designs, where k is the number of influential factors/parameters that are to be investigated. The two levels are usually represented as -1 (lower level) and +1 (higher level) with 2k run for single replicate.[53] In this study, a total six factors with two levels were chosen based on the preliminary study with one replicate point, one block and one centre point per block. The lower (-1) and higher limit (+1) of the factors are as: pH (3 and 11), glucose concentration (0 and 5 g/L), peptone concentration (0 and 10 g/L), salt concentration (0 and 7 g/L), yeast extract concentration (0 and 10 g/L) and inoculation volume (1 and 10% (v/v), respectively. The factorial design 26-1 was selected, which produce total 33 experimental trials, scheme shown in Table 1. All experiments were carried out in 50 mg/L dye solution incubated at 30°C for 48 h.

*S1.2. Response surface methodology for optimization of decolourization conditions*

RSM is a statistical technique used to develop and improve optimization process to achieve optimal response.[17] In this study, CCD was used as RSM, which is based on three steps such as: first, designing and experimental setup; second, response surface modelling through regression; and third, optimization (Du et al., 2010). The relationship and interrelationship among input variables and the experimental response variable were determined by fitting second order polynomial equation. The equation is given as:

where, y is the estimated response variable, β0 is the regression constant, βi is the linear regression coefficient, βii is the quadratic regression coefficient, βij is the bi-linear regression coefficient.[22] In this study, the experimental strategy was planned, keeping in view of actual process conditions that appear in the real decolourization process using industrial dye containing wastewater. Thus, the small central composite design was selected with one factorial point, one axial point, 5 centre point, alpha rotatable (k<6) value 2 and block value 1. The six factors were chosen for SCCD with a lower and higher limit as: pH (5 and 11), temperature (20 and 40°C), dye concentration (50 and 150 mg/L), salt (2 and 6 g/L), yeast extract (3 and 9 g/L), and inoculation volume (3 and 8% (v/v). The total numbers of experimental trials investigated were 33 (shown in Table 2), which was used to estimate the pure error. All experiments were carried out for 48h duration which was found to be sufficient to achieve equilibrium. Latter, the obtained decolourization percentage values of each experimental trial were used as experimental response data to analyse the significance of model. The significance of the model equation was judged by the F-test and its quality can be expressed by regression coefficient (R2), adjusted R2, adequacy precision and lack of fit test value through analysis of variance (ANOVA). The optimized values were obtained by solving the regression model equation and many kinds of response surface plot were constructed for understanding the effects of various process parameters on performance of decolourization process.

Table 1. Analysis of variance (ANOVA) for regular two- level factorial analysis

| Source | Sum of Squares | df | Mean Square | F Value | p-value  Prob > F |  |
| --- | --- | --- | --- | --- | --- | --- |
| Model | 35517.84 | 21 | 1691.33 | 38.64 | < 0.0001 | significant |
| A: pH | 267.48 | 1 | 267.48 | 6.11 | 0.0330 |  |
| B: Glucose | 1400.48 | 1 | 1400.48 | 31.99 | 0.0002 |  |
| C: Peptone | 34.77 | 1 | 34.77 | 0.79 | 0.3937 |  |
| D: Salt | 138.96 | 1 | 138.96 | 3.17 | 0.1051 |  |
| E: Yeast extract | 30395.83 | 1 | 30395.83 | 694.37 | < 0.0001 |  |
| F: Inoculation volume | 924.16 | 1 | 924.16 | 21.11 | 0.0010 |  |
| AB | 255.30 | 1 | 255.30 | 5.83 | 0.0364 |  |
| AC | 16.54 | 1 | 16.54 | 0.38 | 0.5525 |  |
| AD | 0.40 | 1 | 0.40 | 0.01 | 0.9255 |  |
| AE | 112.96 | 1 | 112.96 | 2.58 | 0.1393 |  |
| AF | 8.60 | 1 | 8.60 | 0.20 | 0.6671 |  |
| BC | 91.91 | 1 | 91.91 | 2.10 | 0.1780 |  |
| BD | 13.41 | 1 | 13.41 | 0.31 | 0.5920 |  |
| BE | 1393.56 | 1 | 1393.56 | 31.83 | 0.0002 |  |
| BF | 211.86 | 1 | 211.86 | 4.84 | 0.0524 |  |
| CD | 17.99 | 1 | 17.99 | 0.41 | 0.5359 |  |
| CE | 194.31 | 1 | 194.31 | 4.44 | 0.0614 |  |
| CF | 4.45 | 1 | 4.45 | 0.10 | 0.7563 |  |
| DE | 22.47 | 1 | 22.47 | 0.51 | 0.4901 |  |
| DF | 2.27 | 1 | 2.27 | 0.05 | 0.8245 |  |
| EF | 10.13 | 1 | 10.13 | 0.23 | 0.6409 |  |
| Curvature | 91.07 | 1 | 91.07 | 2.08 | 0.1798 | not significant |
| Residual | 437.75 | 10 | 43.77 |  |  |  |
| Cor Total | 36046.67 | 32 |  |  |  |  |
|  |  |  |  |  |  |  |

Table 2. Coefficient estimate obtained during ANOVA for two-level factorial design

| Factor | Coefficient  Estimate | Standard  Error | 95% CI | | VIF |
| --- | --- | --- | --- | --- | --- |
| Low | High |
| Intercept | 41.93 | 1.17 | 39.33 | 44.54 |  |
| A: pH | 2.89 | 1.17 | 0.29 | 5.50 | 1 |
| B: Glucose | -6.62 | 1.17 | -9.22 | -4.01 | 1 |
| C: Peptone | -1.04 | 1.17 | -3.65 | 1.56 | 1 |
| D: Salt | 2.08 | 1.17 | -0.52 | 4.69 | 1 |
| E: Yeast extract | 30.82 | 1.17 | 28.21 | 33.43 | 1 |
| F: Inoculation volume | 5.37 | 1.17 | 2.77 | 7.98 | 1 |
| AB | 2.82 | 1.17 | 0.22 | 5.43 | 1 |
| AC | 0.72 | 1.17 | -1.89 | 3.33 | 1 |
| AD | 0.11 | 1.17 | -2.49 | 2.72 | 1 |
| AE | 1.88 | 1.17 | -0.73 | 4.48 | 1 |
| AF | 0.52 | 1.17 | -2.09 | 3.12 | 1 |
| BC | -1.69 | 1.17 | -4.30 | 0.91 | 1 |
| BD | 0.65 | 1.17 | -1.96 | 3.25 | 1 |
| BE | -6.60 | 1.17 | -9.21 | -3.99 | 1 |
| BF | 2.57 | 1.17 | -0.03 | 5.18 | 1 |
| CD | -0.75 | 1.17 | -3.36 | 1.86 | 1 |
| CE | -2.46 | 1.17 | -5.07 | 0.14 | 1 |
| CF | -0.37 | 1.17 | -2.98 | 2.23 | 1 |
| DE | 0.84 | 1.17 | -1.77 | 3.44 | 1 |
| DF | 0.27 | 1.17 | -2.34 | 2.87 | 1 |
| EF | 0.56 | 1.17 | -2.04 | 3.17 | 1 |
| Centre Point | -9.69 | 6.72 | -24.66 | 5.28 | 1 |

Figure S1 Perturbation plot of operational parameters obtained through regular two-factor design

Table 3 Coefficient estimate obtained during ANOVA for response surface quadratic model in CCD

| Factor | Coefficient  Estimate | Standard  Error | 95% CI | | VIF |
| --- | --- | --- | --- | --- | --- |
| Low | High |
| Intercept | 60.50 | 1.19 | 57.45 | 63.55 |  |
| A-pH | 5.59 | 1.03 | 2.94 | 8.23 | 3 |
| B-Temperature | 1.74 | 1.03 | -0.90 | 4.39 | 3 |
| C-Dye concentration | 14.83 | 1.03 | 12.19 | 17.48 | 3 |
| D-Salt | 6.74 | 1.03 | 4.09 | 9.38 | 3 |
| E-Yeast extract | 19.57 | 1.03 | 16.92 | 22.21 | 3 |
| F-Inoculation volume | 1.38 | 1.03 | -1.27 | 4.02 | 3 |
| AB | 4.89 | 0.73 | 3.02 | 6.76 | 1 |
| AC | 2.00 | 0.73 | 0.13 | 3.87 | 1 |
| AD | 4.08 | 1.26 | 0.84 | 7.32 | 3 |
| AE | 2.57 | 1.26 | -0.67 | 5.81 | 3 |
| AF | -2.95 | 0.73 | -4.82 | -1.08 | 1 |
| BC | 1.56 | 1.26 | -1.67 | 4.80 | 3 |
| BD | 4.90 | 0.73 | 3.03 | 6.77 | 1 |
| BE | 0.07 | 0.73 | -1.80 | 1.94 | 1 |
| BF | 18.03 | 1.26 | 14.79 | 21.27 | 3 |
| CD | 0.44 | 0.73 | -1.43 | 2.31 | 1 |
| CE | -1.68 | 0.73 | -3.55 | 0.19 | 1 |
| CF | -18.24 | 1.26 | -21.48 | -15.00 | 3 |
| DE | -0.51 | 1.26 | -3.75 | 2.73 | 3 |
| DF | 0.86 | 0.73 | -1.01 | 2.73 | 1 |
| EF | 2.18 | 0.73 | 0.31 | 4.05 | 1 |
| A2 | 5.21 | 0.53 | 3.85 | 6.57 | 1 |
| B2 | -11.59 | 0.53 | -12.96 | -10.23 | 1 |
| C2 | -7.64 | 0.53 | -9.01 | -6.28 | 1 |
| D2 | 1.21 | 0.53 | -0.16 | 2.57 | 1 |
| E2 | -1.93 | 0.53 | -3.29 | -0.56 | 1 |
| F2 | 3.48 | 0.53 | 2.12 | 4.85 | 1 |

Figure S2a.

Figure S2b.

Figure S2c.

Figure S2d.

Figure S2e.

Figure S1. Diagnostic plots constructed during ANOVA analysis: (a) normal plot of residuals; (b) predicted versus actual plot; (c) Box-Cox plot for power transforms; (d) leverage versus run; (e) Cook's distance.

Figure S3a.

Figure S3b.

Figure S3c.

Figure S3d.

Figure S3e.

Figure S3f.

Figure S3g.

Figure S3h.

Figure S3i.

Figure S3j.

Figure S3k.

Figure S3. Contour plot for operational factors exhibiting interactive effects on decolourization of RO16 dye using *Pseudomonas aeruginosa* 23N1: (a) salt and pH; (b) inoculation volume and dye concentration; (c) pH and temperature; (d) dye concentration and pH; (e) inoculation volume and pH; (f) salt and temperature; (g) inoculation volume and temperature; (h) inoculation volume and yeast extract; (i) salt and dye concentration; (j) yeast extract and dye concentration; (k) dye concentration and temperature

**S2. Kinetics decolourization study**

The data of decolourization percentage for initial dye solution 50 mg/L and 150 mg/L is found to be well fitted to the following empirical equation (1) and (2) respectively.

....................................................... Equation (1)

..................................................... Equation (2)

where, y is the dye decolourization percentage and t is the culture incubation time in hour. This empirical model equation 1 and 2 are obtained with R2 value 0.93 and 0.91, respectively. Fig S4a and S4b represents the rate of decolourization with respect to time for initial dye solution of 50 mg/L and 150 mg/L, respectively.

Figure S4a.

Figure S4b.

Figure S4. The kinetic empirical model graph of RR21 decolourization percentage: (a) for initial dye solution 50 mg/L; (b) for initial dye solution 150 mg/L

From Figure S4, it can be observed that the decolourization of RO 16 dye begins significantly after the 2h of incubation period. The saturation of the decolourization process is observed after 32h of incubation period. The results support the significance and validation of predicted quadratic optimization model used in this study.

Table 4 Characteristic of real textile industrial wastewater

| S. no. | Parameters | Analysed value |
| --- | --- | --- |
|  | pH | 2.3 |
|  | Total dissolved solid (mg/L) | 4860 |
|  | Total suspended solid (mg/L) | 305 |
|  | Electrical conductivity (μS/cm) | 5965 |
|  | Total hardness (mg/L) | 206 |
|  | Chloride (mg/L) | 960 |
|  | Initial ADMI | 301.98 |

Reference

52 Alara, O. R.; Abdurahman, N. H.; Olalere, O. A. Ethanolic Extraction of Flavonoids, Phenolics and Antioxidants from *Vernonia Amygdalina* Leaf Using Two-Level Factorial Design. *J. King Saud Uni. Sci*. 2017, DOI: 10.1016/j.jksus.2017.08.001.

53 Kuo, P. H.; Zhang, B. C.; Su, C. S.; Liu, J. J.; Sheu, M. T. Application of Two-Level Factorial Design to Investigate the Effect of Process Parameters on the Sonocrystallization of Sulfathiazole. *J. Cryst. Growth* 2017, 471, 8–14.
